# Supplementary material for: Oligo(3-hexylthiophene)-functionalized dicyano-ethylene substituted quinacridone derivatives: synthesis, characterizations and applications as acceptors in photovoltaic devices
Source: Royal Society of Chemistry journal article supplement (doi:10.1039/c2nj40306d), 2012-01-01

# **Oligo(3-hexylthiophene)-Functionalized Dicyano-ethylene Substituted Quinacridone Derivatives: Synthesis, Characterizations and Applications as Acceptors in Photovoltaic Devices**

Chenguang Wang,<sup>a</sup> Weiping Chen,<sup>a</sup> Shanyong Chen,<sup>a</sup> Shanshan Zhao,<sup>a</sup> Jingying Zhang,<sup>\*a</sup> Dengli Qiu,<sup>b</sup> and Yue Wang<sup>\*a</sup>

<sup>a</sup> State Key Laboratory of Supramolecular Structure and Materials, College of Chemistry, Jilin University, Changchun 130012, P. R. China

<sup>b</sup> Bruker AXS GmbH Beijing Representative Office, Bruker Nano Inc., Beijing 100081, P. R. China

\* To whom correspondence should be addressed. E-mail: yuewang@jlu.edu.cn

|                                                                                                                                                                        |    |
|------------------------------------------------------------------------------------------------------------------------------------------------------------------------|----|
| <b>Figure S1.</b> Cyclic voltammograms of DCN-Tn-QA (n = 1–3).                                                                                                         | 2  |
| <b>Table S1.</b> The photovoltaic performances of [ITO/PEDOT:PSS/P3HT:DCN-T2-QA/LiF/Al] spin-coated from different solvent under AM 1.5 G, 100 mW cm <sup>-2</sup> .   | 3  |
| <b>Table S2.</b> The photovoltaic performances of [ITO/PEDOT:PSS/P3HT:DCN-T2-QA/LiF/Al] at different annealing temperature under AM 1.5 G, 100 mW cm <sup>-2</sup> .   | 3  |
| <b>Table S3.</b> The photovoltaic performances of [ITO/PEDOT:PSS/P3HT:DCN-T2-QA/LiF/Al] at different ratio of donor/acceptor under AM 1.5 G, 100 mW cm <sup>-2</sup> . | 4  |
| <b>Figure S2.</b> <sup>1</sup> H NMR spectra of <b>1</b> recorded in CDCl <sub>3</sub> (300 M Hz).                                                                     | 5  |
| <b>Figure S3.</b> <sup>1</sup> H NMR spectra of <b>2</b> recorded in CDCl <sub>3</sub> (300 M Hz).                                                                     | 6  |
| <b>Figure S4.</b> <sup>13</sup> C NMR spectra of <b>2</b> recorded in CDCl <sub>3</sub> (75 M Hz).                                                                     | 7  |
| <b>Figure S5.</b> <sup>1</sup> H NMR spectra of <b>3</b> recorded in CDCl <sub>3</sub> (300 M Hz).                                                                     | 8  |
| <b>Figure S6.</b> <sup>1</sup> H NMR spectra of <b>4</b> recorded in CDCl <sub>3</sub> (300 M Hz).                                                                     | 9  |
| <b>Figure S7.</b> <sup>13</sup> C NMR spectra of <b>4</b> recorded in CDCl <sub>3</sub> (75 M Hz).                                                                     | 10 |
| <b>Figure S8.</b> <sup>1</sup> H NMR spectra of <b>5</b> recorded in CDCl <sub>3</sub> (300 M Hz).                                                                     | 11 |
| <b>Figure S9.</b> <sup>13</sup> C NMR spectra of <b>5</b> recorded in CDCl <sub>3</sub> (75 M Hz).                                                                     | 12 |
| <b>Figure S10.</b> <sup>1</sup> H NMR spectra of <b>6</b> recorded in CDCl <sub>3</sub> (300 M Hz).                                                                    | 13 |
| <b>Figure S11.</b> <sup>13</sup> C NMR spectra of <b>6</b> recorded in CDCl <sub>3</sub> (75 M Hz).                                                                    | 14 |
| <b>Figure S12.</b> <sup>1</sup> H NMR spectra of <b>7</b> recorded in CDCl <sub>3</sub> (300 M Hz).                                                                    | 15 |
| <b>Figure S13.</b> <sup>13</sup> C NMR spectra of <b>7</b> recorded in CDCl <sub>3</sub> (75 M Hz).                                                                    | 16 |
| <b>Figure S14.</b> <sup>1</sup> H NMR spectra of <b>8</b> recorded in CDCl <sub>3</sub> (500 M Hz).                                                                    | 17 |
| <b>Figure S15.</b> <sup>13</sup> C NMR spectra of <b>8</b> recorded in CDCl <sub>3</sub> (75 M Hz).                                                                    | 18 |
| <b>Figure S16.</b> <sup>1</sup> H NMR spectra of <b>DCN-T1-QA</b> recorded in CDCl <sub>3</sub> (500 M Hz).                                                            | 19 |
| <b>Figure S17.</b> <sup>13</sup> C NMR spectra of <b>DCN-T1-QA</b> recorded in CDCl <sub>3</sub> (75 M Hz).                                                            | 20 |
| <b>Figure S18.</b> <sup>1</sup> H NMR spectra of <b>DCN-T2-QA</b> recorded in CDCl <sub>3</sub> (500 M Hz).                                                            | 21 |
| <b>Figure S19.</b> <sup>13</sup> C NMR spectra of <b>DCN-T2-QA</b> recorded in CDCl <sub>3</sub> (75 M Hz).                                                            | 22 |
| <b>Figure S20.</b> <sup>1</sup> H NMR spectra of <b>DCN-T3-QA</b> recorded in CDCl <sub>3</sub> (500 M Hz).                                                            | 23 |
| <b>Figure S21.</b> <sup>13</sup> C NMR spectra of <b>DCN-T3-QA</b> recorded in CDCl <sub>3</sub> (75 M Hz).                                                            | 24 |

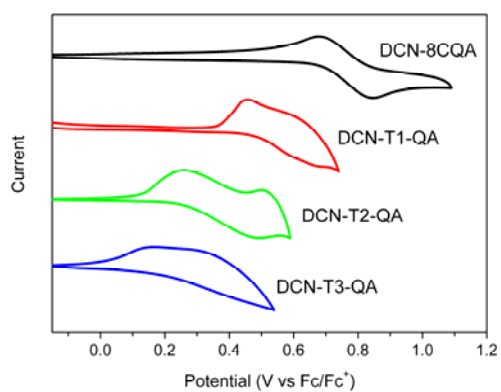

**Figure S1.** Cyclic voltammograms of DCN-Tn-QA ( $n = 1-3$ ) in  $\text{CH}_2\text{Cl}_2$  solution, measured with TBAPF (0.1 M) as a supporting electrolyte at a scan rate of  $100 \text{ mV s}^{-1}$ .

**Table S1.** The photovoltaic performances of [ITO/PEDOT:PSS/P3HT:DCN-T2-QA/LiF/Al] spin-coated from different solvent under AM 1.5 G, 100 mW cm<sup>-2</sup>

| Solvent                   | (V : V) | $V_{oc}$<br>(V) | $J_{sc}$<br>(mA cm <sup>-2</sup> ) | FF<br>(%) | PCE<br>(%) |
|---------------------------|---------|-----------------|------------------------------------|-----------|------------|
| o-DCB : CHCl <sub>3</sub> | 1 : 1   | 0.46            | 2.80                               | 40        | 0.51       |
| o-DCB : CHCl <sub>3</sub> | 2 : 1   | 0.44            | 2.51                               | 43        | 0.47       |
| o-DCB                     |         | 0.46            | 1.86                               | 46        | 0.40       |

The weight ratio of P3HT : DCN-T2-QA is 1 : 1 and the annealing temperature is 60 °C (10 min) and the active layer is about 110 nm.

**Table S2.** The photovoltaic performances of [ITO/PEDOT:PSS/P3HT:DCN-T2-QA/LiF/Al] at different annealing temperature under AM 1.5 G, 100 mW cm<sup>-2</sup>

| Annealing temperature | $V_{oc}$<br>(V) | $J_{sc}$<br>(mA cm <sup>-2</sup> ) | FF<br>(%) | PCE<br>(%) |
|-----------------------|-----------------|------------------------------------|-----------|------------|
| Without annealing     | 0.54            | 1.52                               | 29        | 0.24       |
| 60 °C for 10 min      | 0.46            | 2.80                               | 40        | 0.51       |
| 80 °C for 10 min      | 0.44            | 2.03                               | 37        | 0.33       |

The weight ratio of P3HT : DCN-T2-QA is 1 : 1 and the solvent is o-DCB/CHCl<sub>3</sub> (1 : 1, V : V) and the active layer is about 110 nm.

**Table S3.** The photovoltaic performances of [ITO/PEDOT:PSS/P3HT:DCN-T2-QA/LiF/Al] at different ratio of donor/acceptor under AM 1.5 G, 100 mW cm<sup>-2</sup>

| P3HT:DCN-T2-QA (w:w) | $V_{oc}$<br>(V) | $J_{sc}$<br>(mA cm <sup>-2</sup> ) | FF<br>(%) | PCE<br>(%) |
|----------------------|-----------------|------------------------------------|-----------|------------|
| 1.0 : 1.5            | 0.46            | 2.13                               | 44        | 0.43       |
| 1.0 : 1.0            | 0.46            | 2.80                               | 40        | 0.51       |
| 1.5 : 1.0            | 0.42            | 1.86                               | 42        | 0.33       |

The annealing temperature is 60 °C (10 min) and the solvent is o-DCB/CHCl<sub>3</sub> (1 : 1, V : V) and the active layer is about 110 nm.

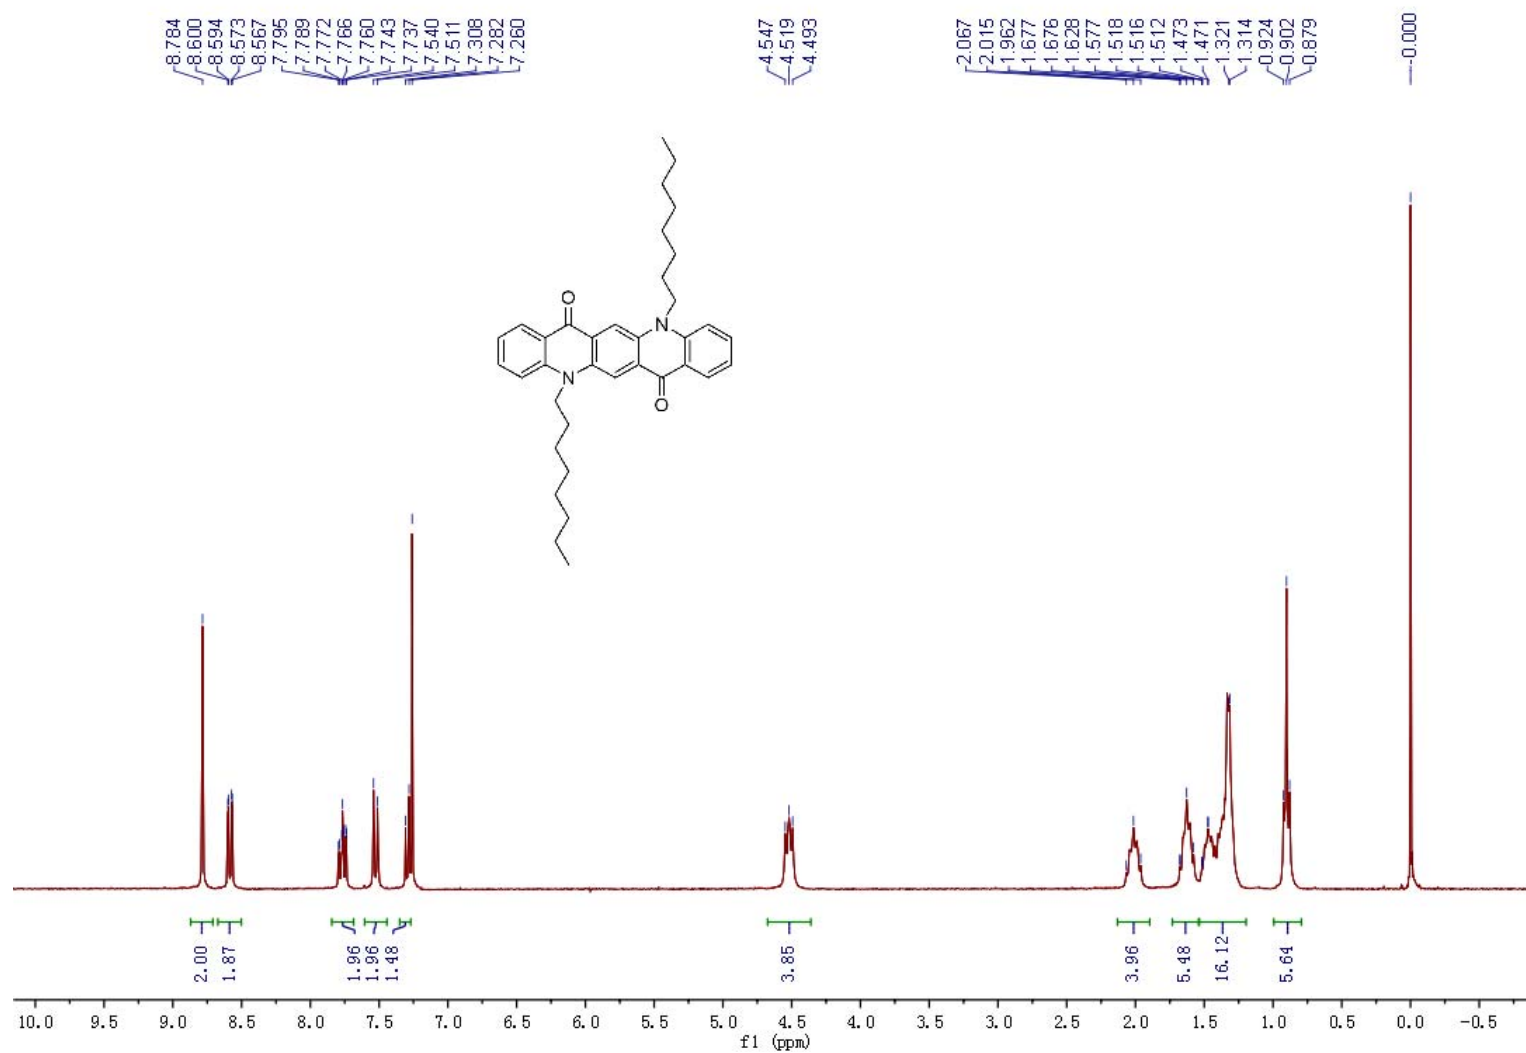

**Figure S2.** <sup>1</sup>H NMR spectra of **1** recorded in CDCl<sub>3</sub> (300 M Hz).

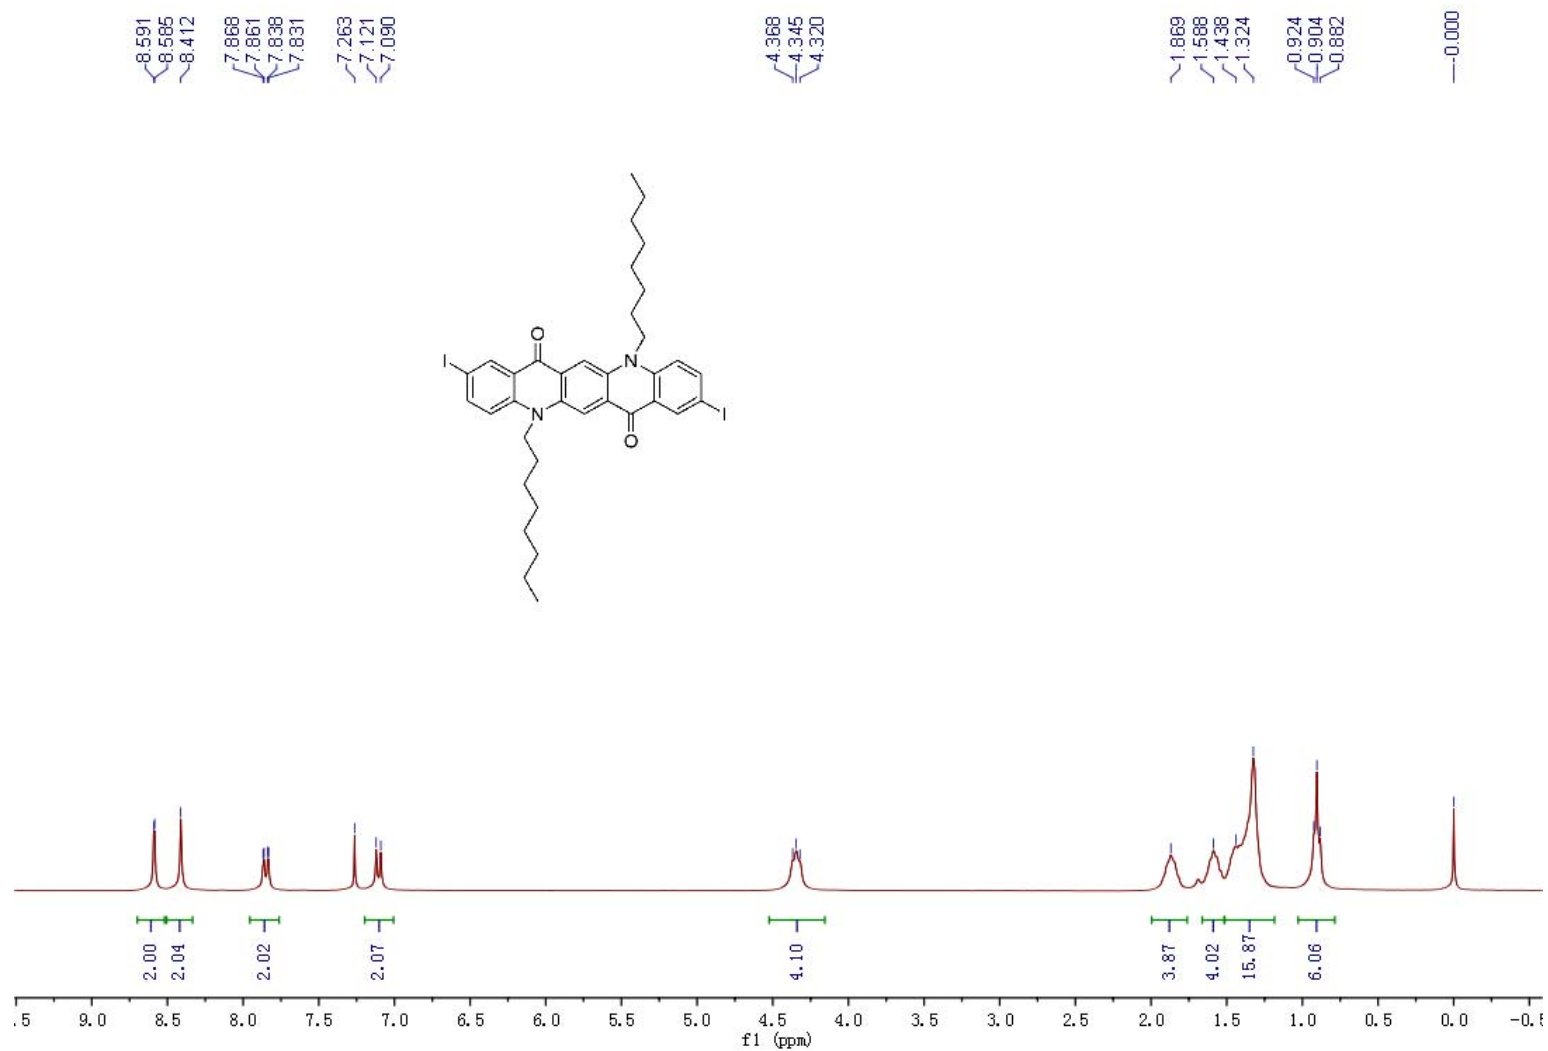

**Figure S3.** <sup>1</sup>H NMR spectra of **2** recorded in CDCl<sub>3</sub> (300 M Hz).

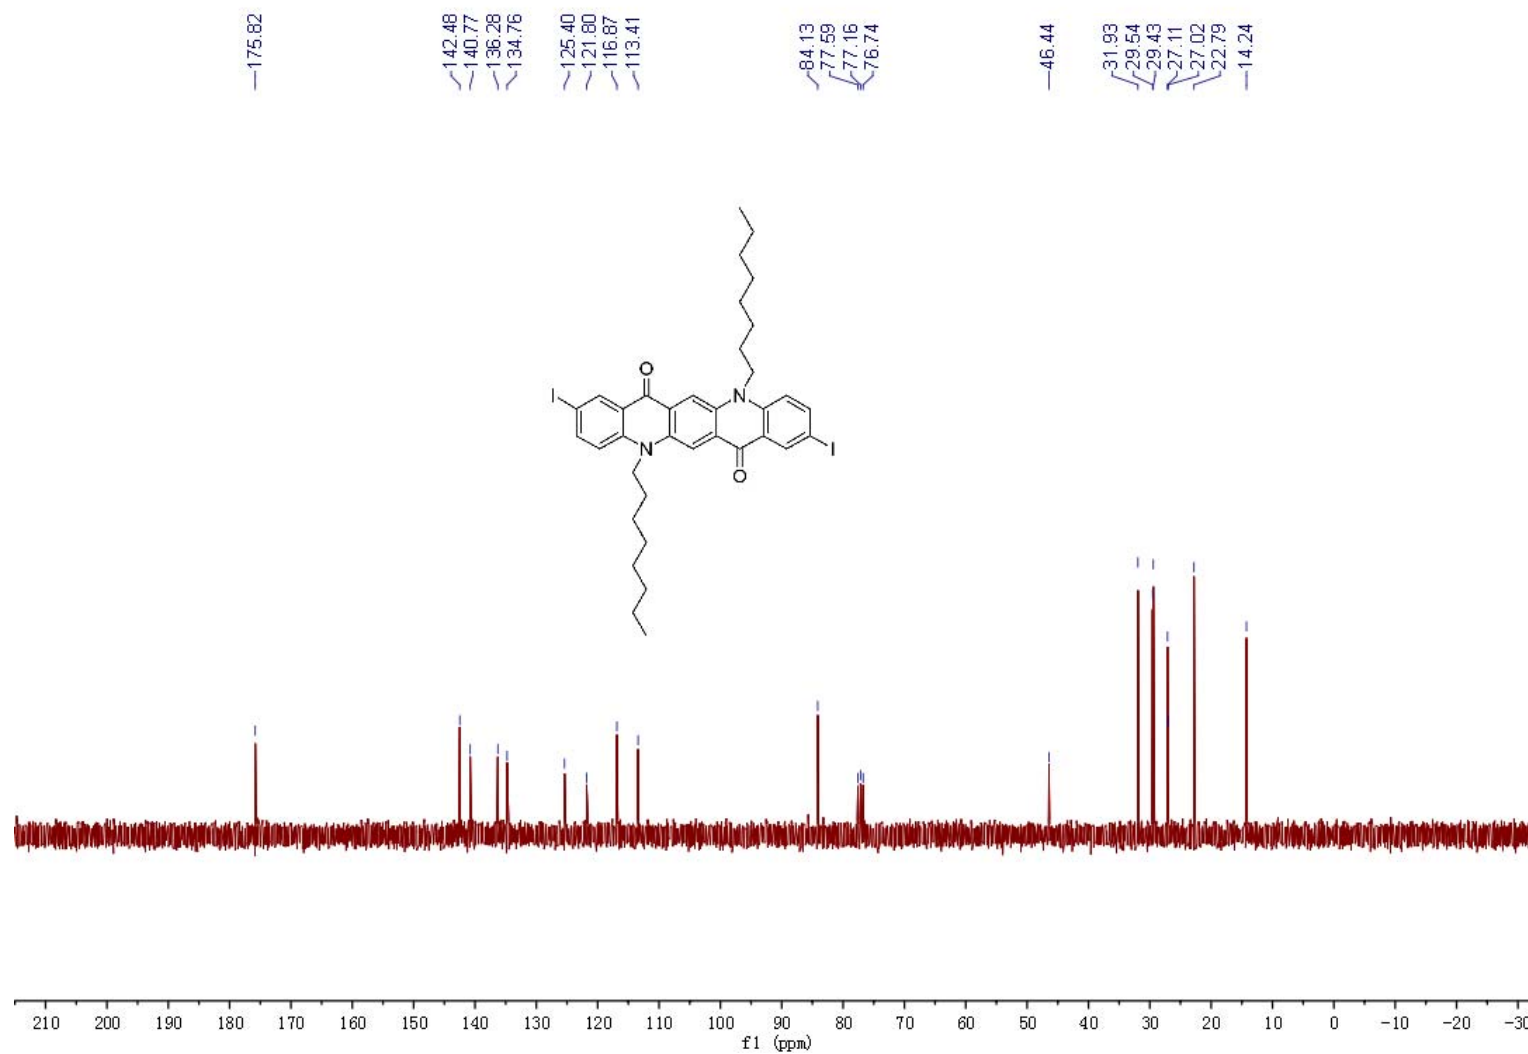

**Figure S4.** <sup>13</sup>C NMR spectra of **2** recorded in CDCl<sub>3</sub> (75 M Hz).

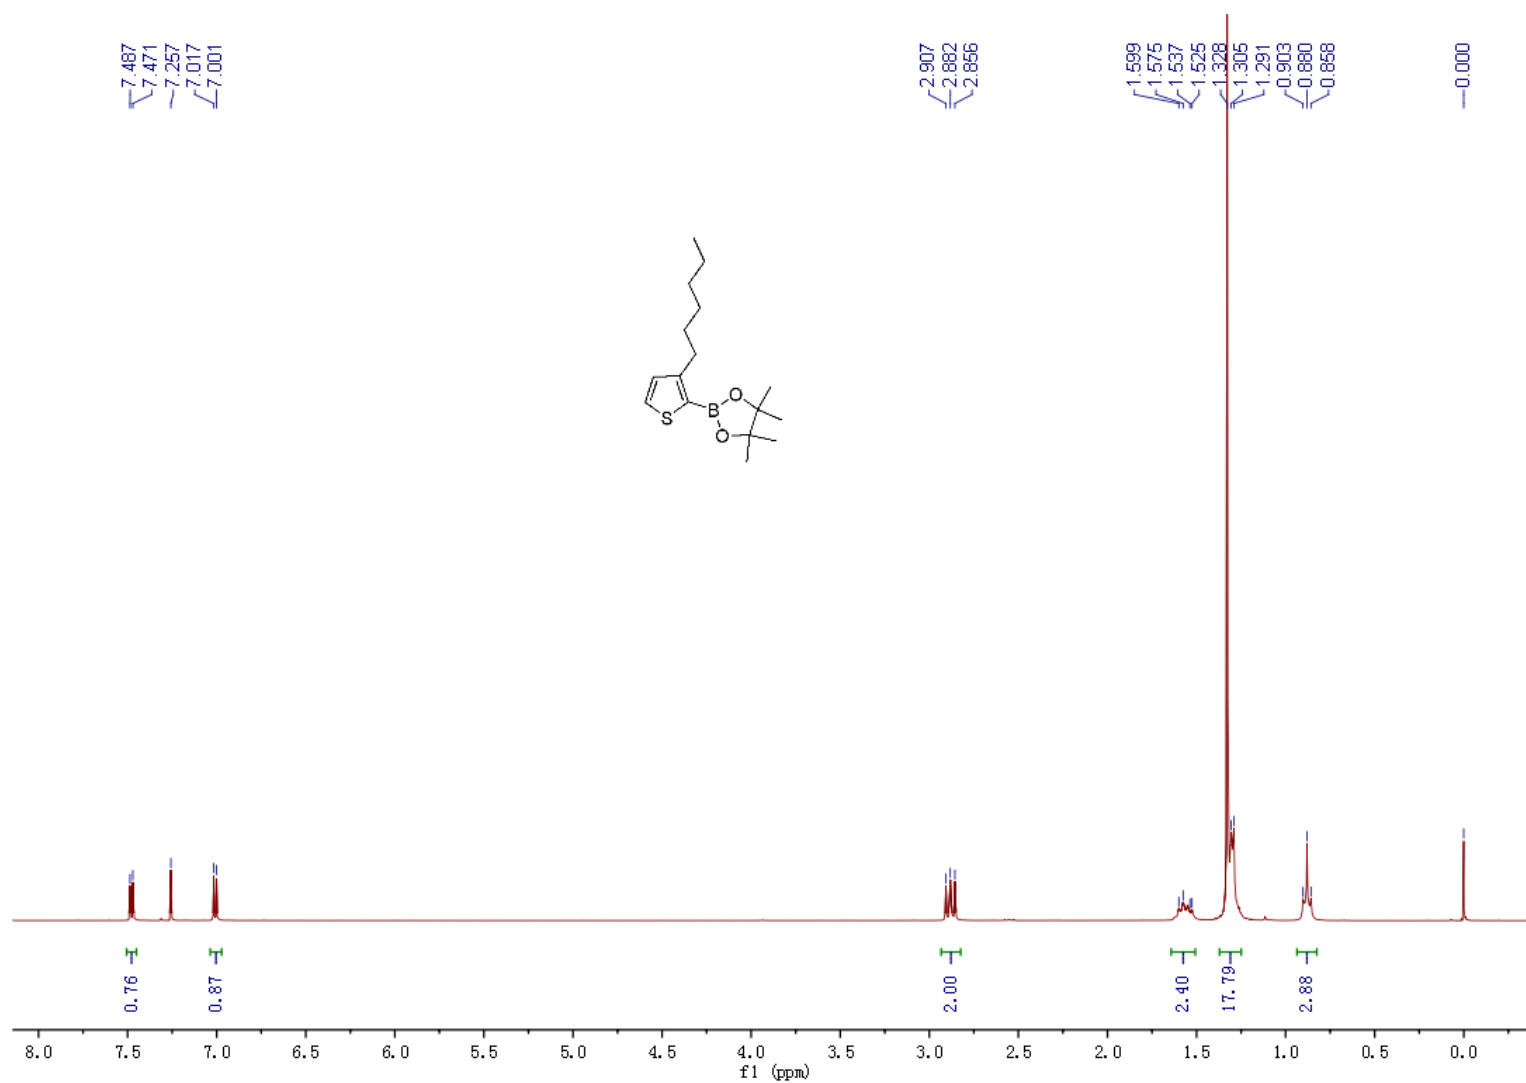

**Figure S5.** <sup>1</sup>H NMR spectra of **3** recorded in CDCl<sub>3</sub> (300 M Hz).



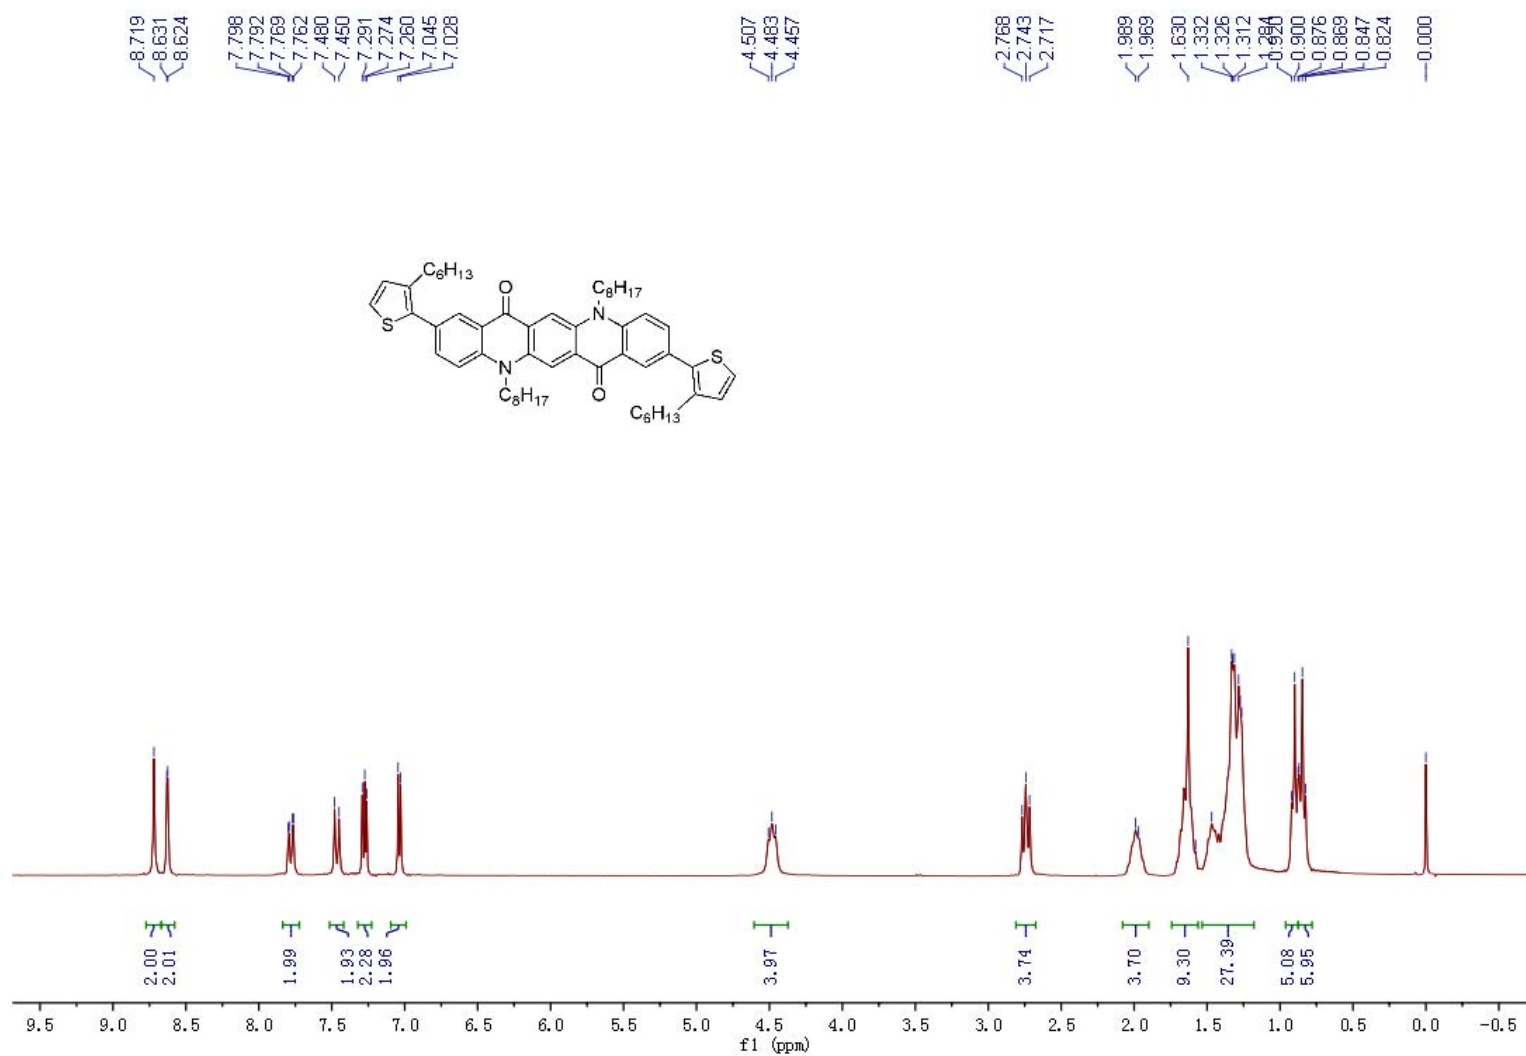

**Figure S6.** <sup>1</sup>H NMR spectra of **4** recorded in CDCl<sub>3</sub> (300 M Hz).

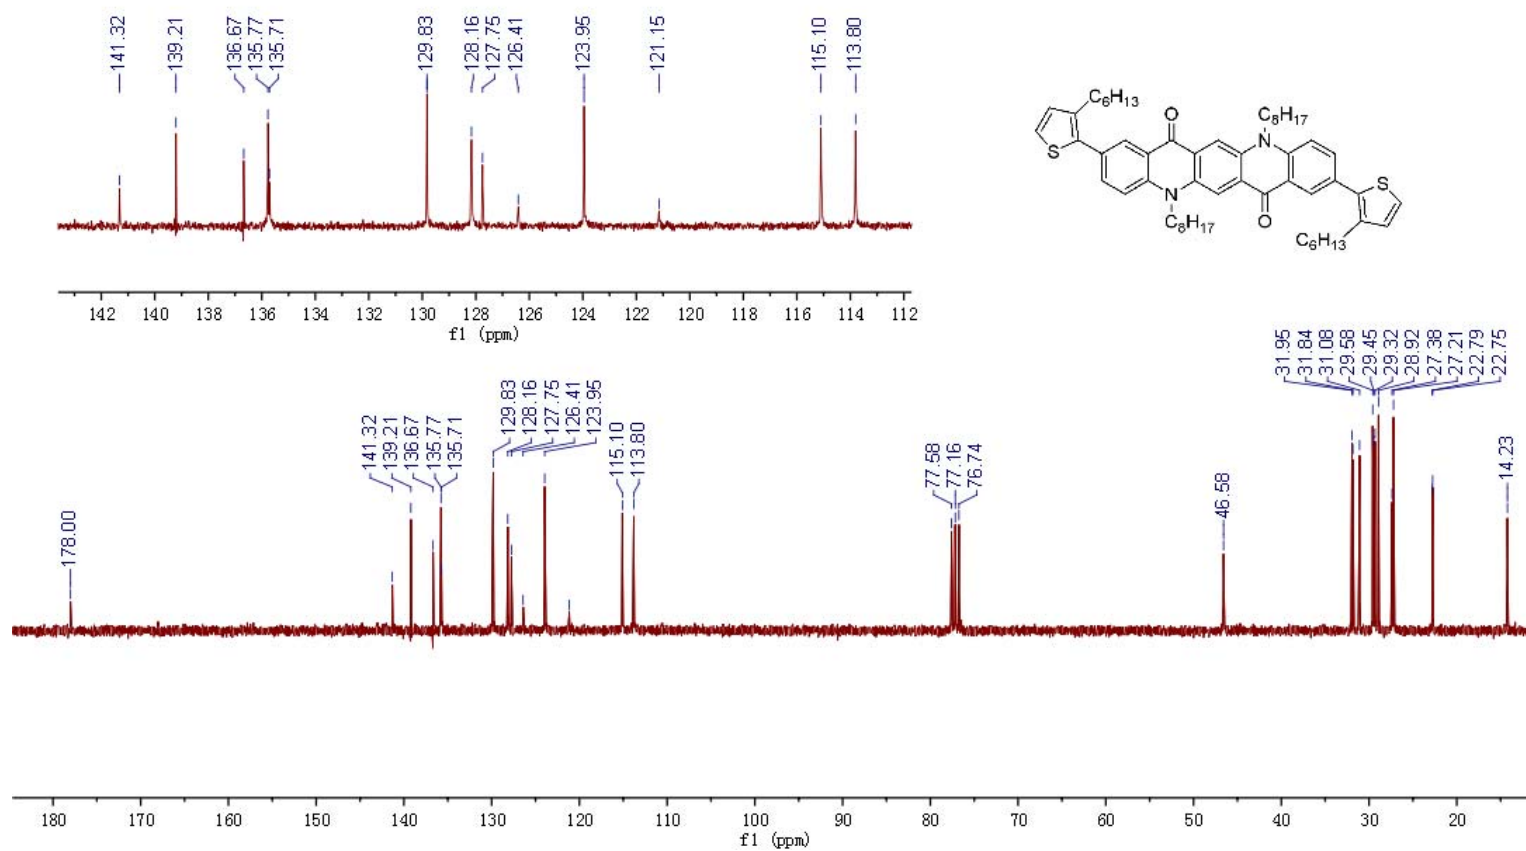

**Figure S7.** <sup>13</sup>C NMR spectra of **4** recorded in CDCl<sub>3</sub> (75 M Hz).

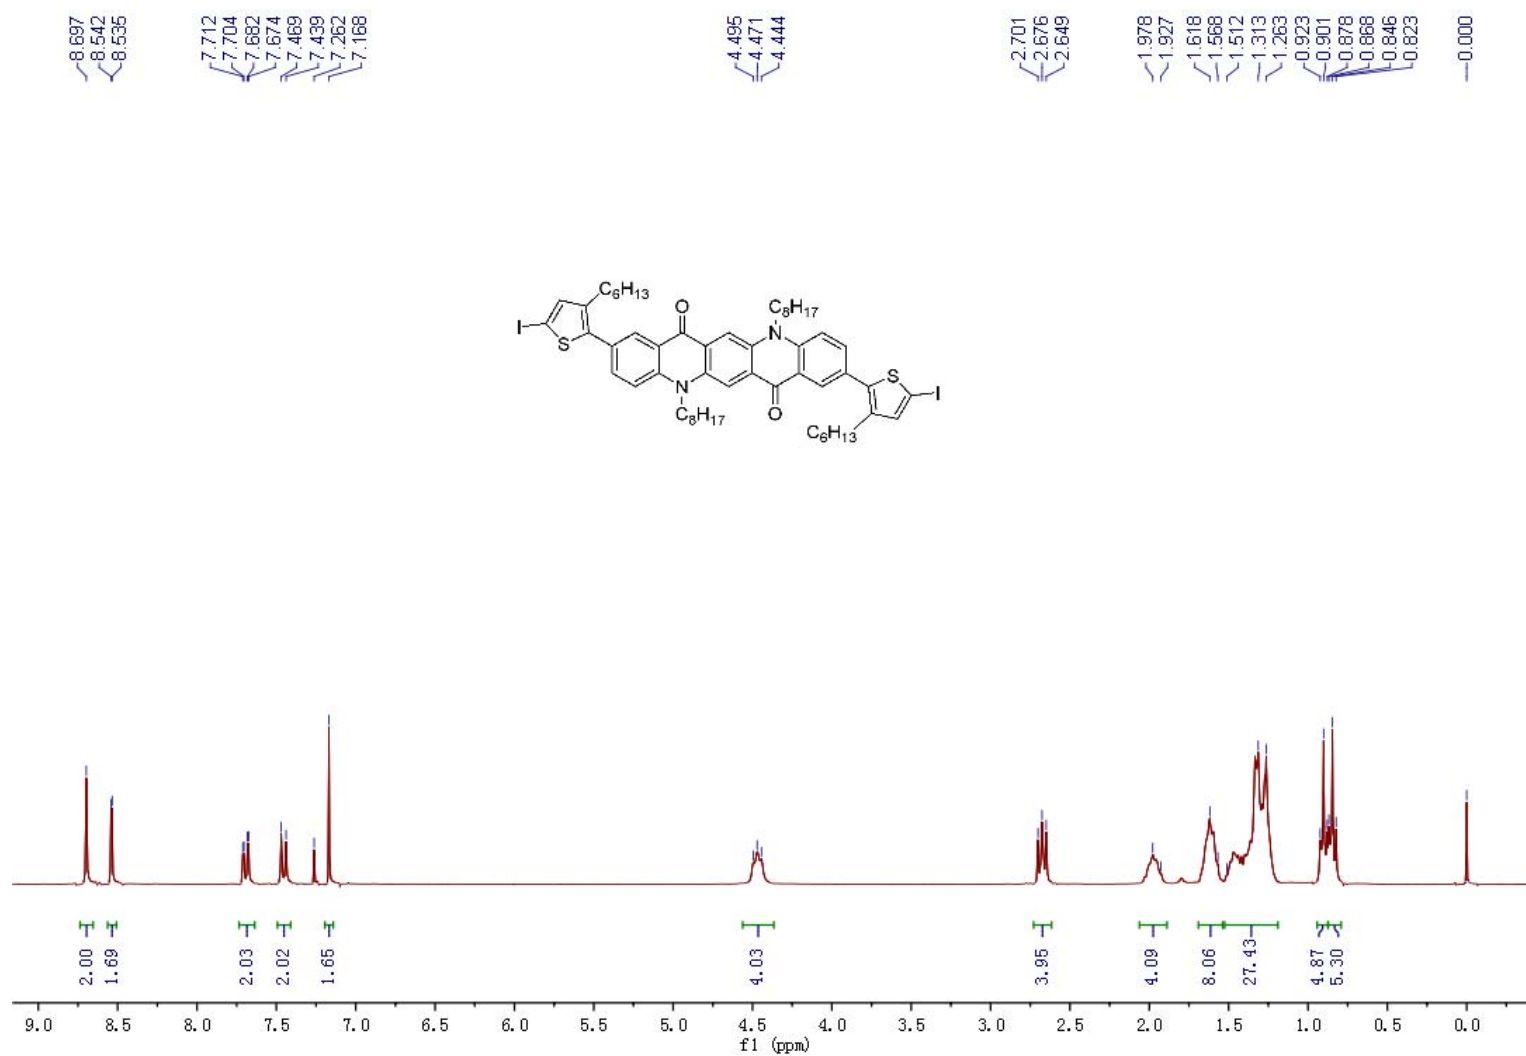

**Figure S8.** <sup>1</sup>H NMR spectra of **5** recorded in CDCl<sub>3</sub> (300 M Hz).

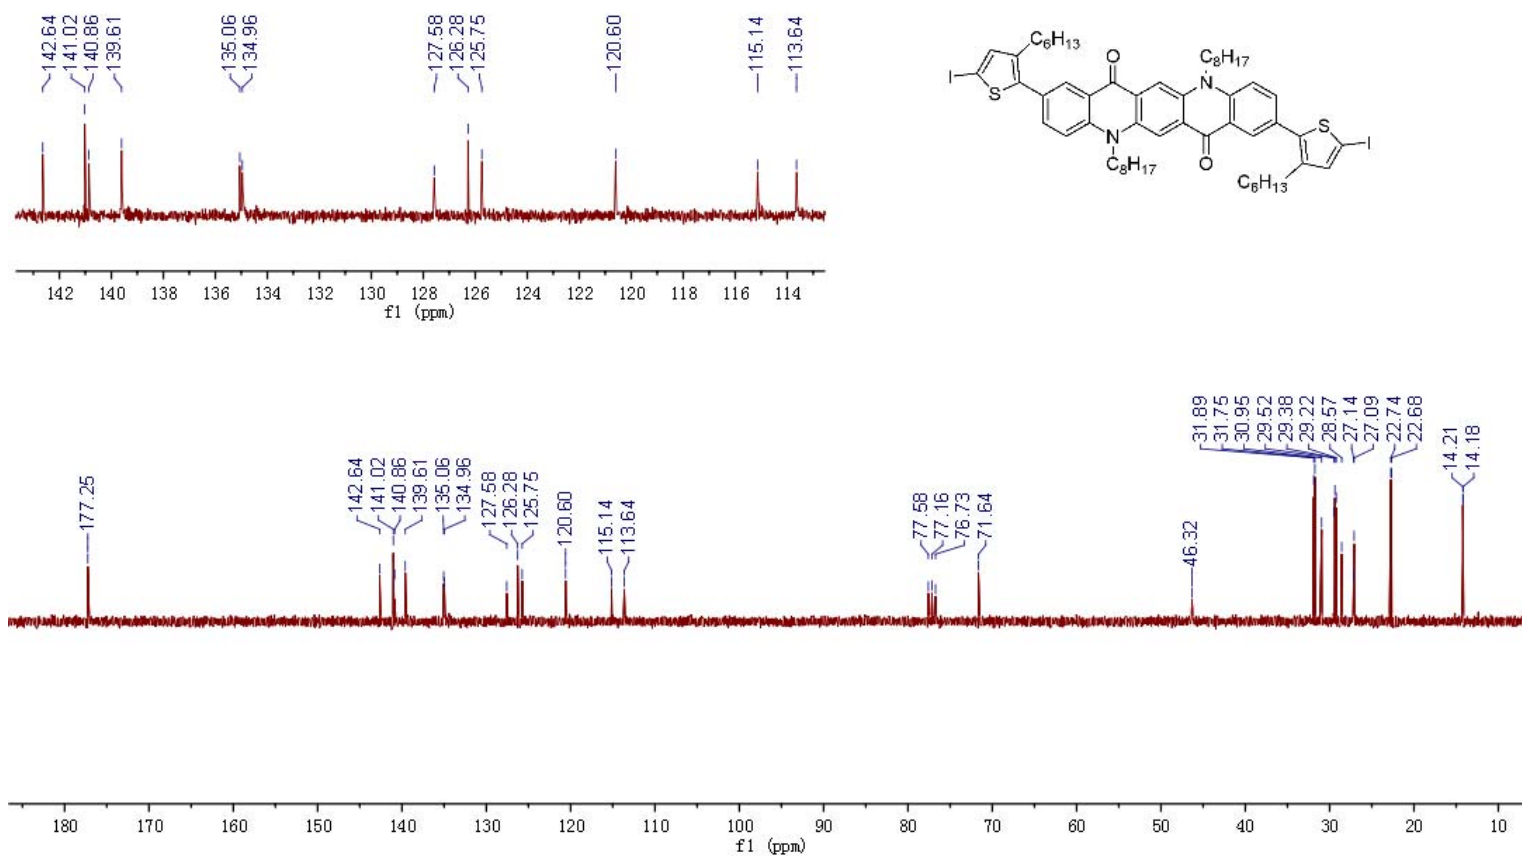

**Figure S9.**  $^{13}\text{C}$  NMR spectra of **5** recorded in  $\text{CDCl}_3$  (75 M Hz).

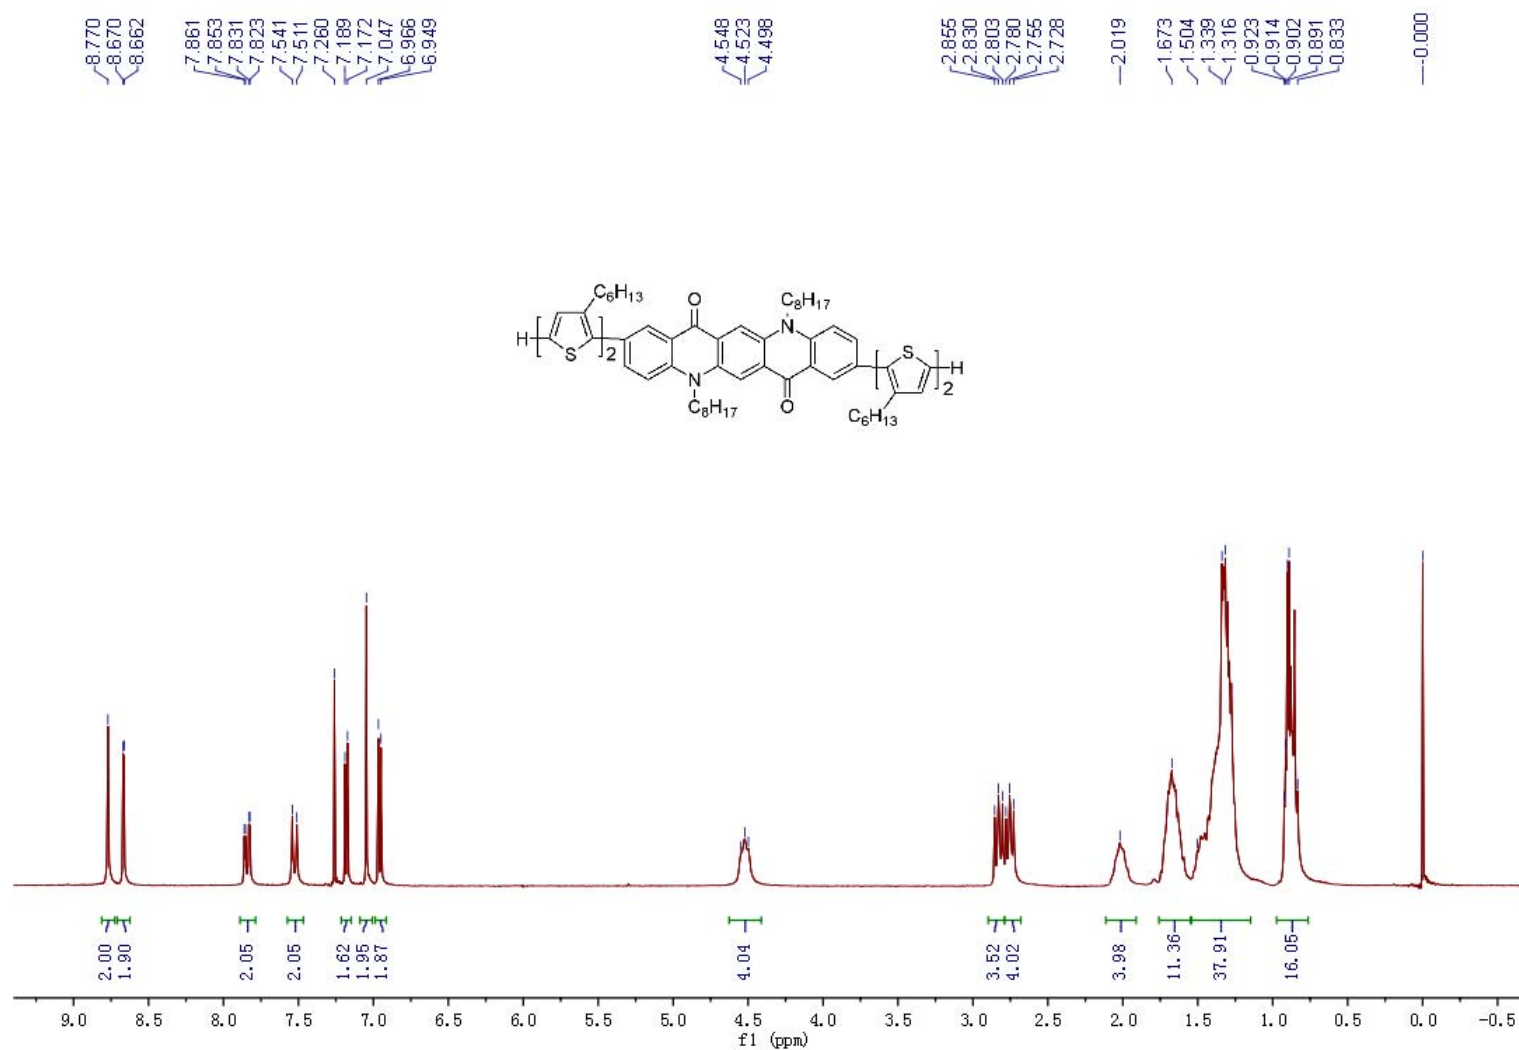

**Figure S10.**  $^1\text{H}$  NMR spectra of **6** recorded in  $\text{CDCl}_3$  (300 M Hz).

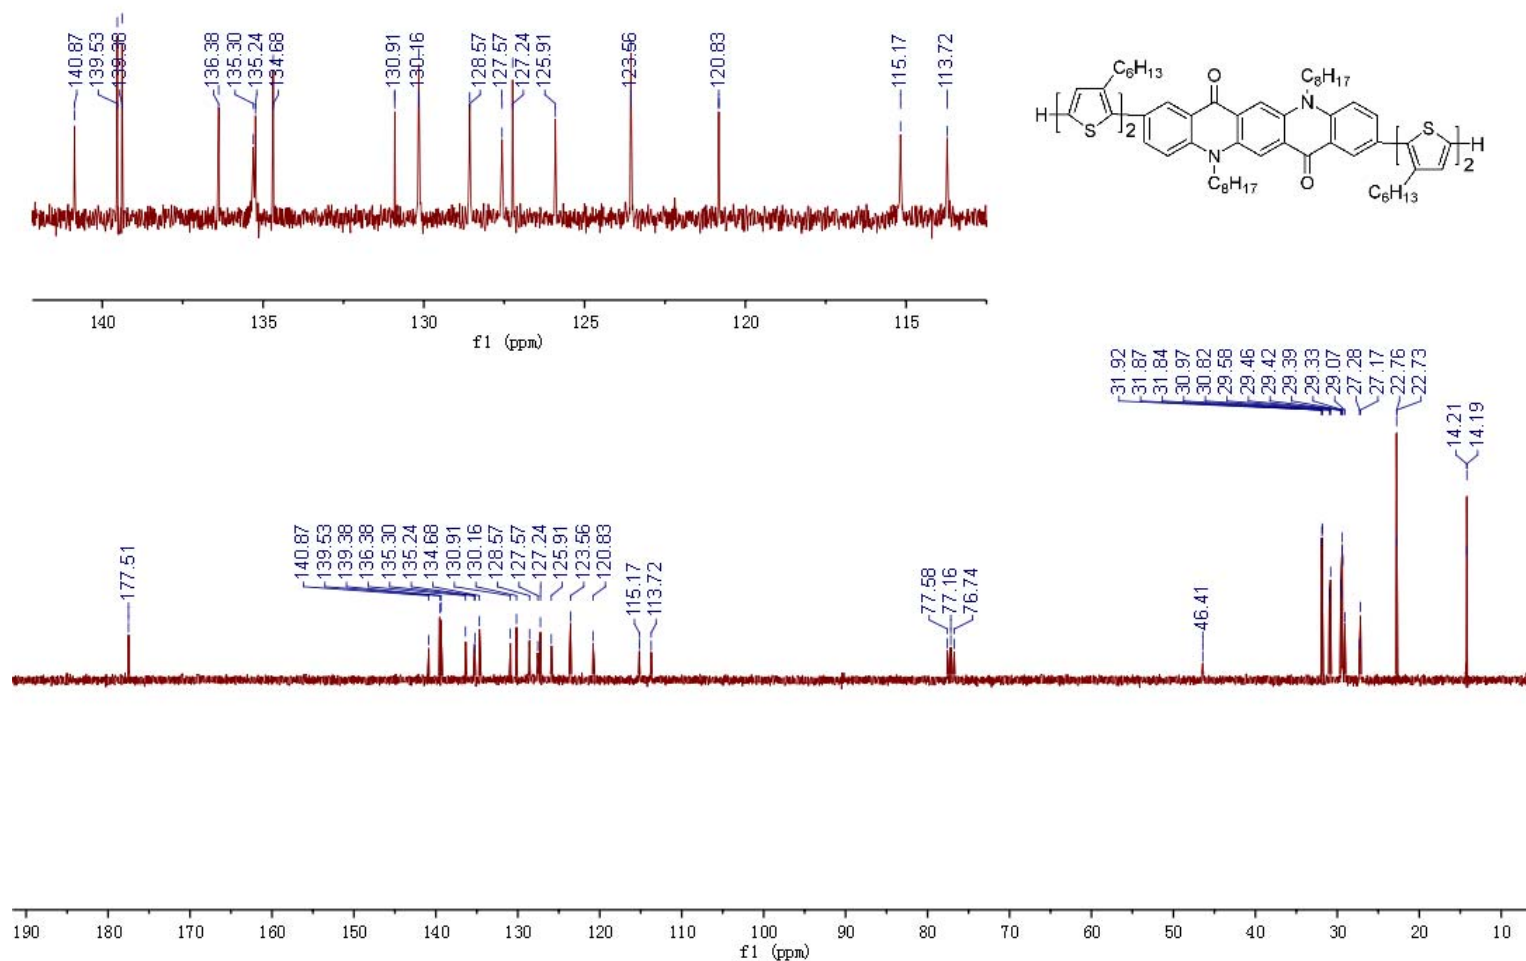

**Figure S11.**  $^{13}\text{C}$  NMR spectra of **6** recorded in  $\text{CDCl}_3$  (75 M Hz).

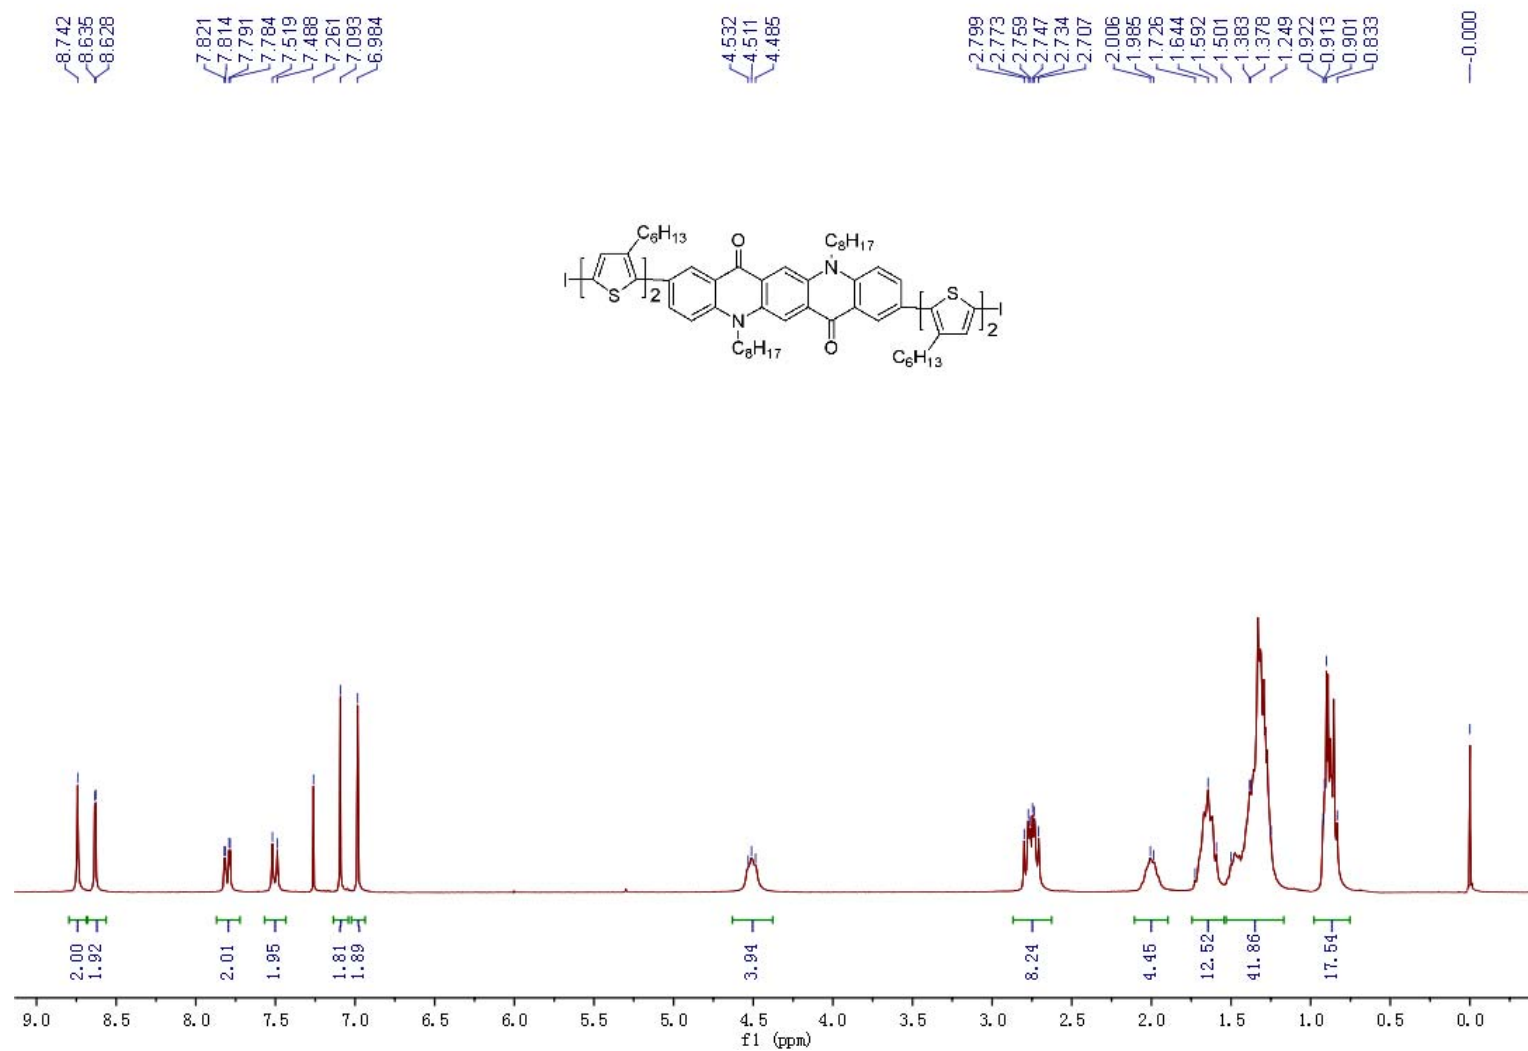

**Figure S12.** <sup>1</sup>H NMR spectra of **7** recorded in CDCl<sub>3</sub> (300 M Hz).

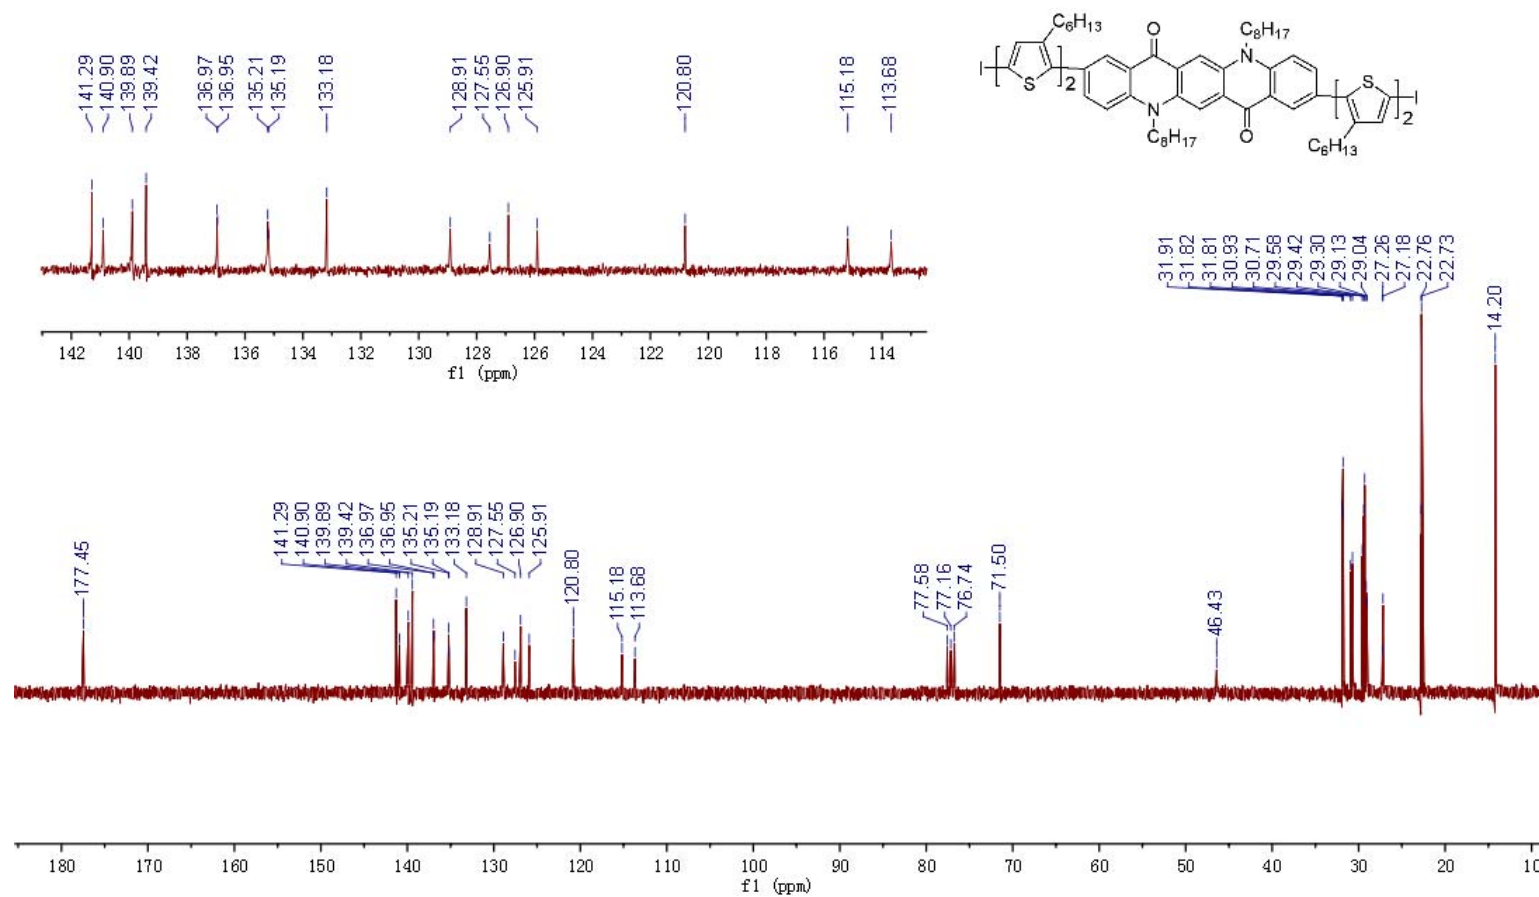

**Figure S13.**  $^{13}\text{C}$  NMR spectra of **7** recorded in  $\text{CDCl}_3$  (75 M Hz).



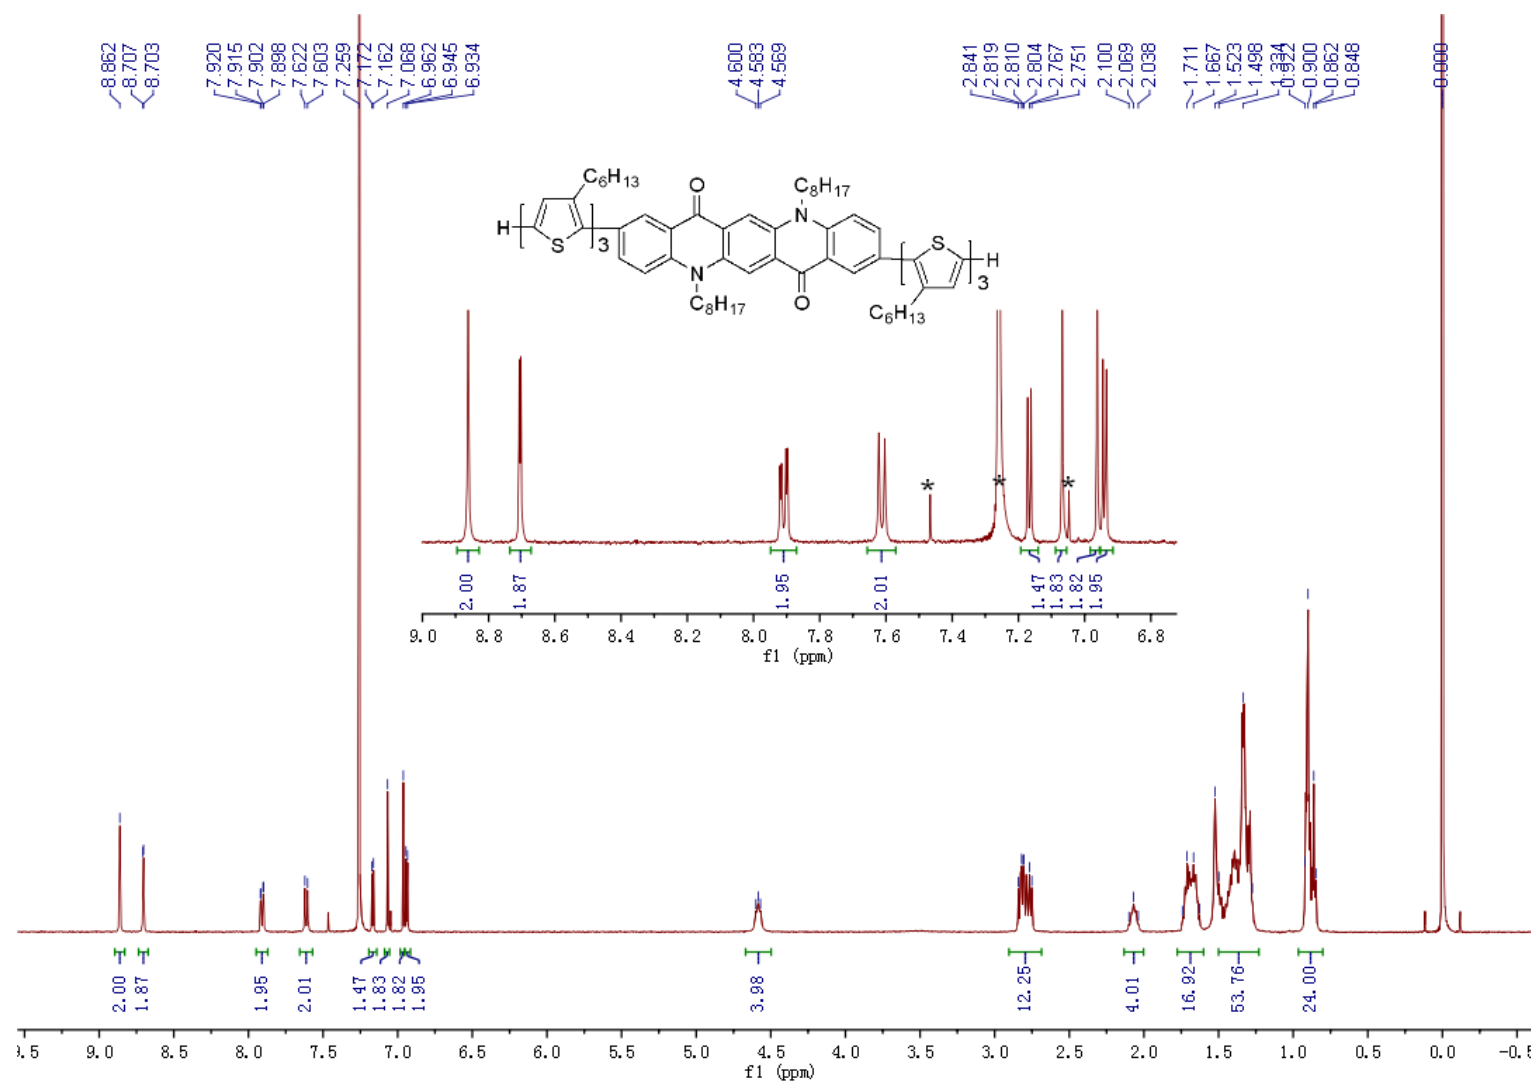

**Figure S14.** <sup>1</sup>H NMR spectra of **8** recorded in CDCl<sub>3</sub> (500 M Hz).

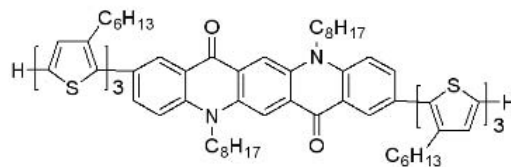

**Figure S15.**  $^{13}\text{C}$  NMR spectra of **8** recorded in  $\text{CDCl}_3$  (75 M Hz).

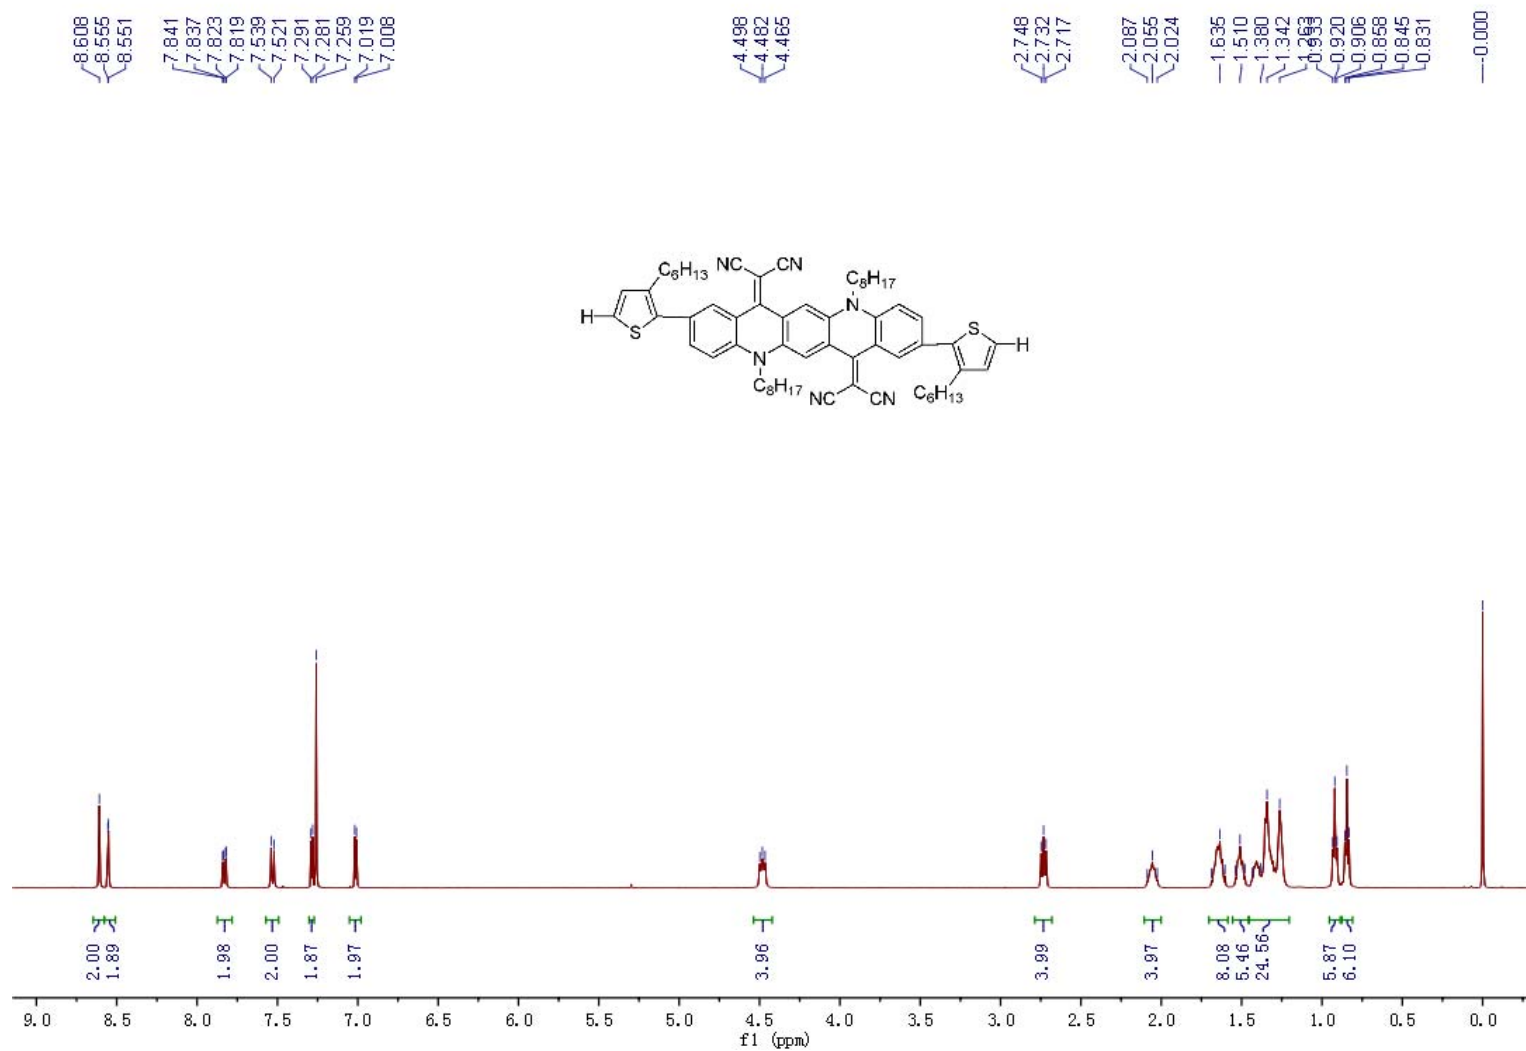

**Figure S16.** <sup>1</sup>H NMR spectra of **DCN-T1-QA** recorded in CDCl<sub>3</sub> (500 M Hz).

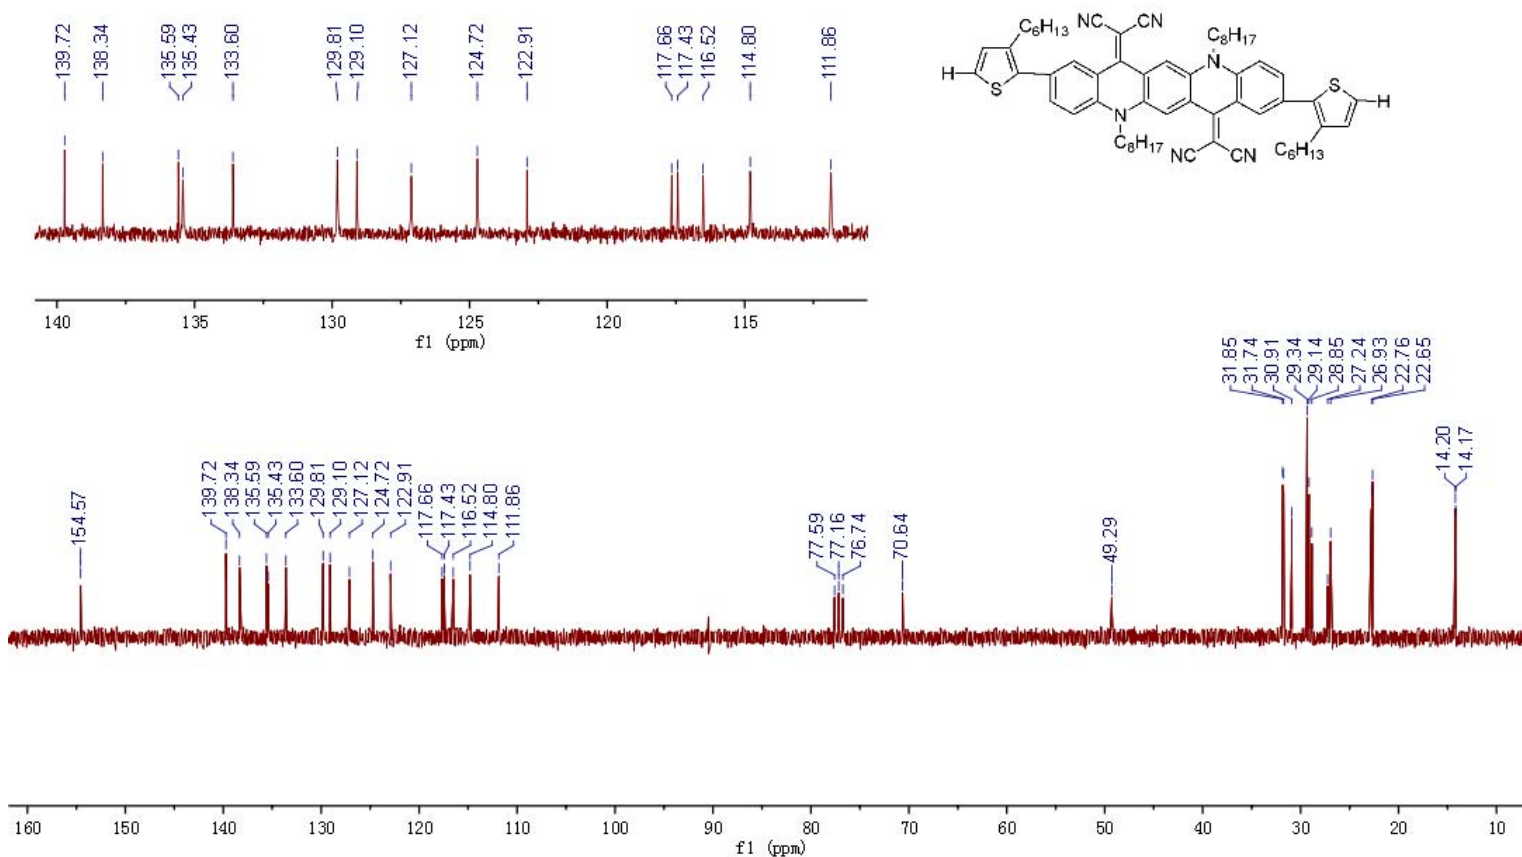

**Figure S17.**  $^{13}\text{C}$  NMR spectra of **DCN-T1-QA** recorded in  $\text{CDCl}_3$  (75 M Hz).

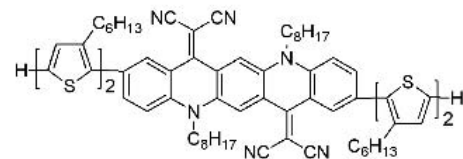

**Figure S18.**  $^1\text{H}$  NMR spectra of **DCN-T2-QA** recorded in  $\text{CDCl}_3$  (500 M Hz).



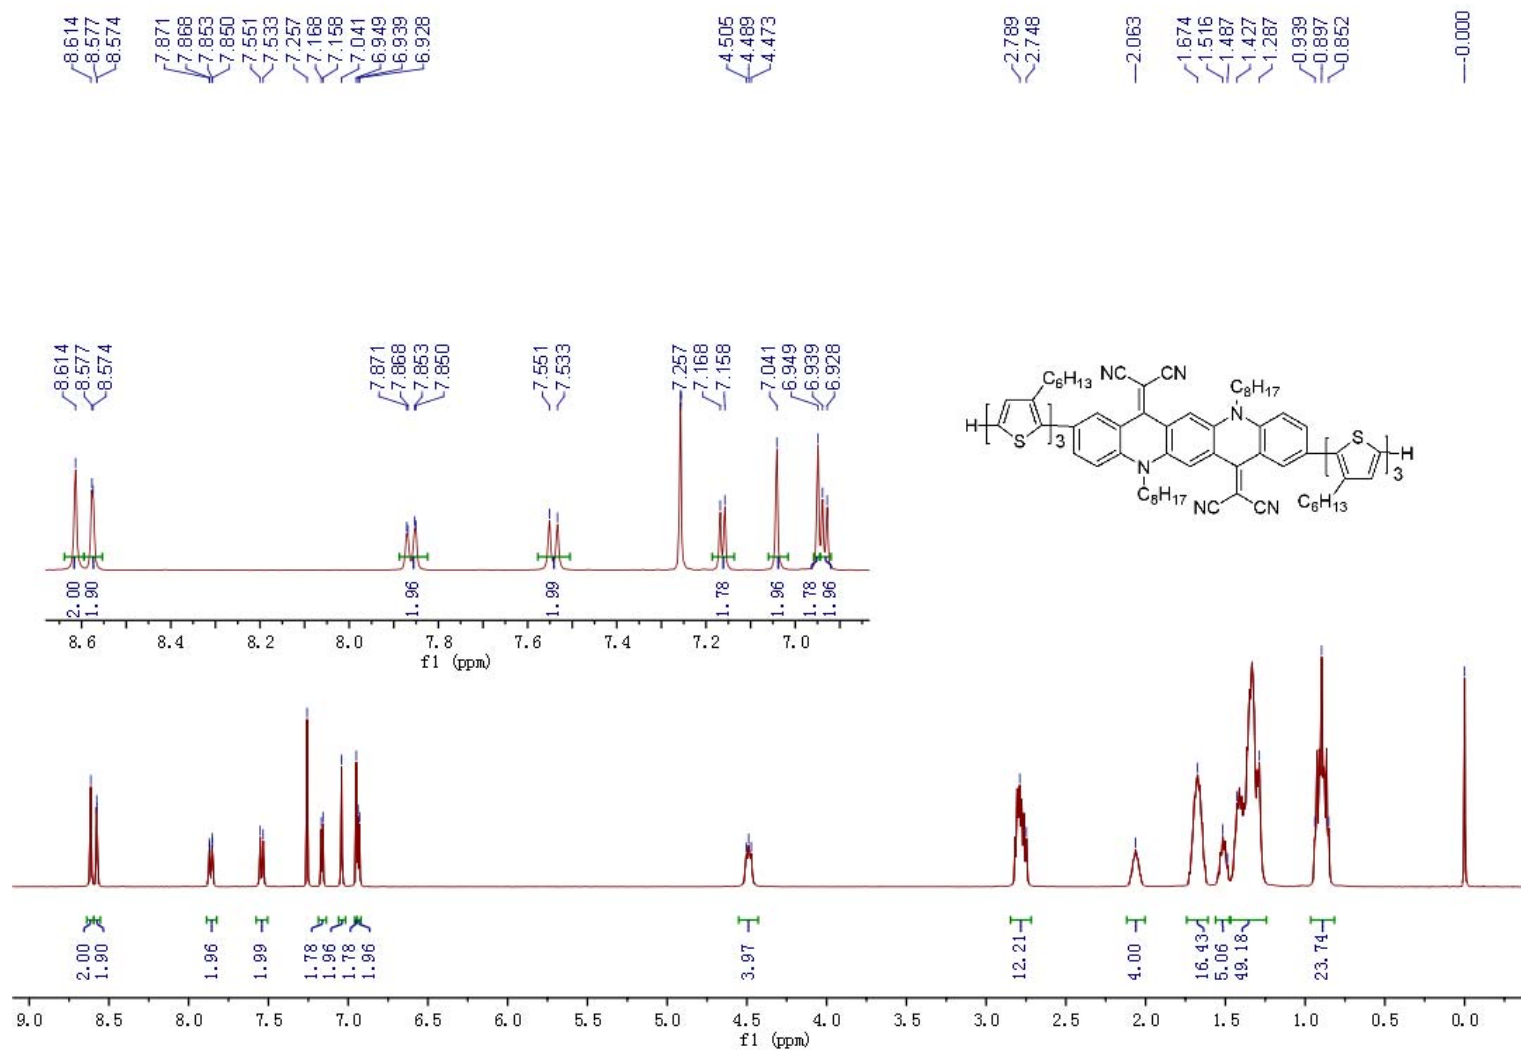

**Figure S20.** <sup>1</sup>H NMR spectra of **DCN-T3-QA** recorded in CDCl<sub>3</sub> (500 M Hz).



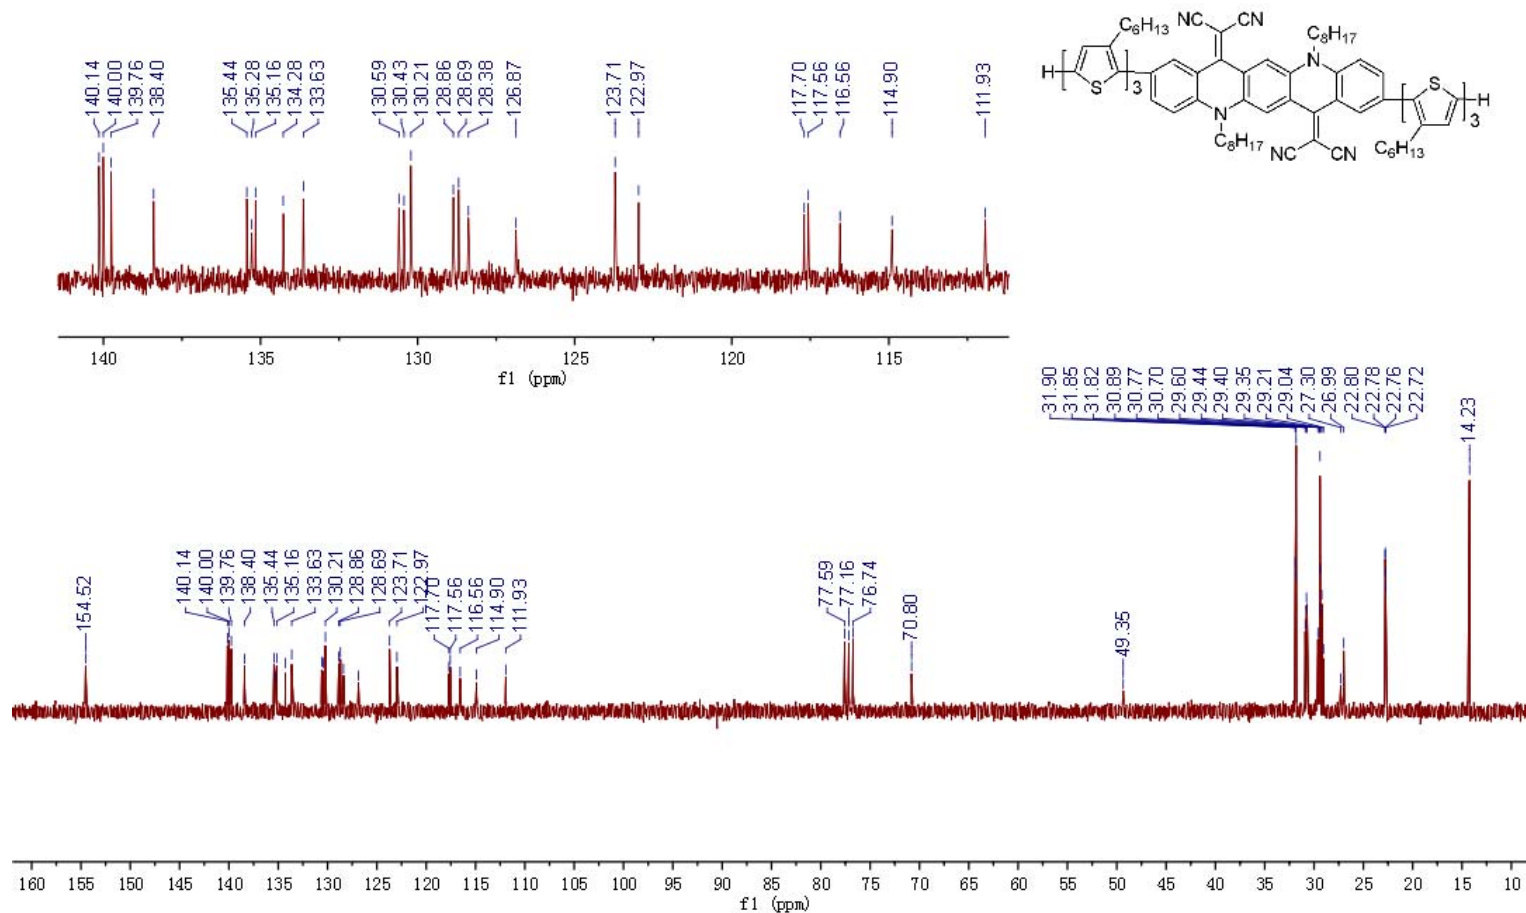

Supplement: c2nj40306d.pdf [file c2nj40306d.pdf]
